# Supplementary material for: A biocompatible cellulose gum based CMC/PVA/SBA-15 film as a colloidal antibacterial agent against MRSA
Source: PubMed Central journal article supplement (PMC11559378; doi:10.1039/d4ra07129h), 2024-11-13
Supplement: RA-014-D4RA07129H-s001.pdf [file RA-014-D4RA07129H-s001.pdf]

## Supporting information

### **Biocompatible cellulose gum-based CMC/PVA/SBA-15 film as a colloidal antibacterial agent against MRSA**

Shiva Pakzad, Reza Taghavi, Amir Hasanzadeh, Sadegh Rostamnia

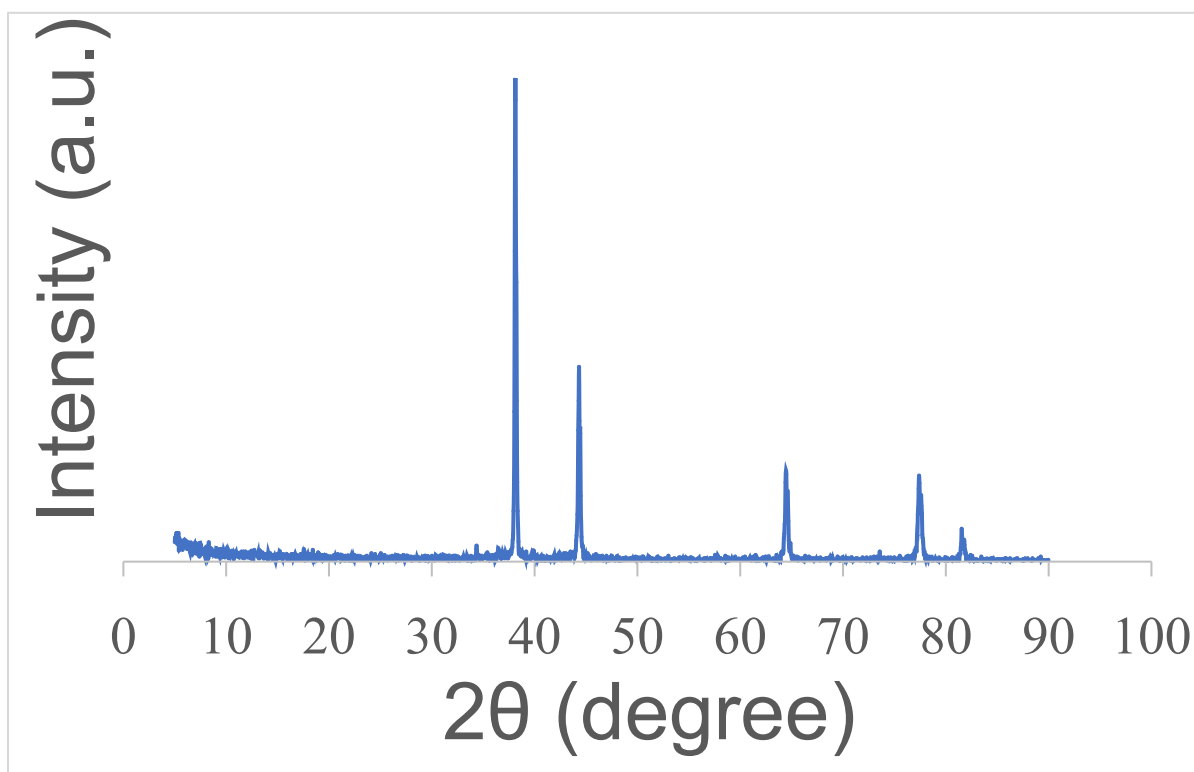

**Fig. S1.** The XRD pattern of the Free Ag NPs.
